# Supplementary material for: Microfluidic studies of hydrostatic pressure-enhanced doxorubicin resistance in human breast cancer cells
Source: Royal Society of Chemistry journal article supplement (doi:10.1039/d0lc01103g), 2021-01-01
Supplement: d0lc01103g1.pdf [file d0lc01103g1.pdf]

## Supplementary Materials

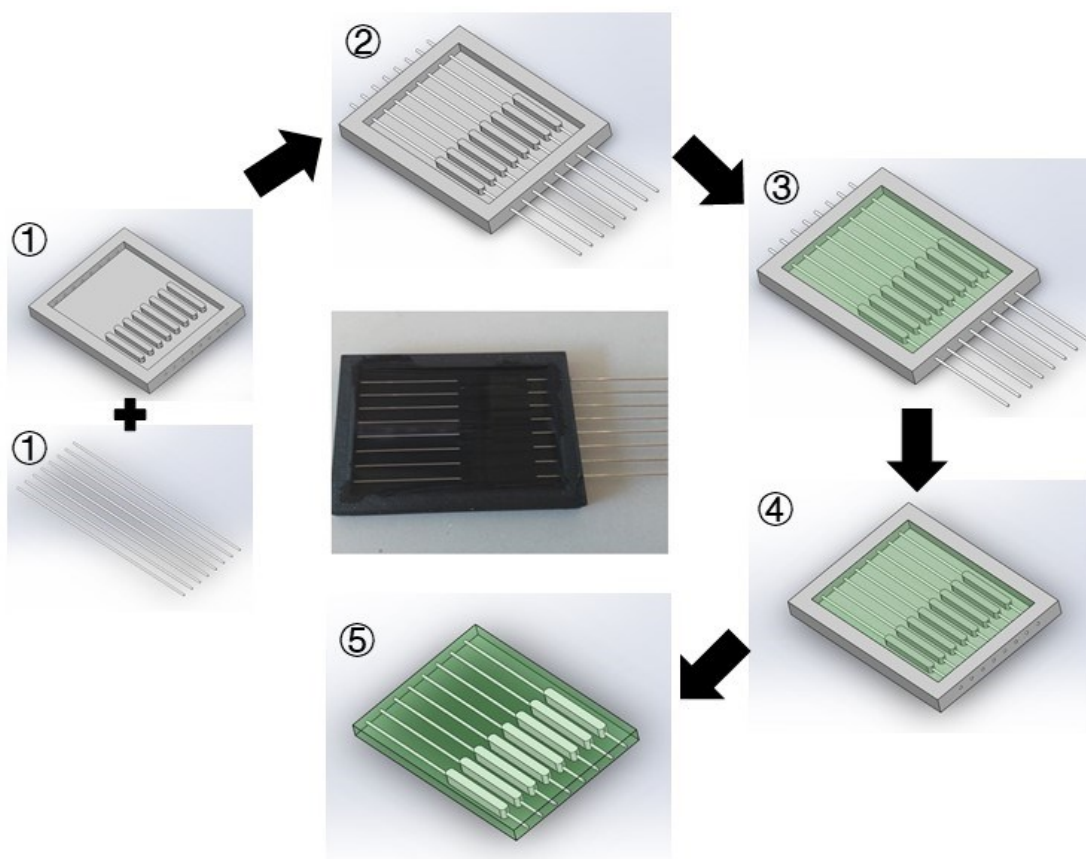

**Supplementary Figure 1. Schematic of PDMS barrier fabrication process.** A 3D printed mold was fabricated by firstly creating stl. file using SOLIDWOKRS 2016, followed by highest resolution print using flexible photopolymer resin in Formlabs Form 2. The channels in the 3D mold needs to be washed using syringes before curing. The 3D printed mold together with eight stainless steel pins whose diameters are 0.8 mm are used to fabricate the PDMS barrier layer. After insertion of the stainless pins, degassed PDMS prepolymer mixture was poured into the mold and incubated in a warm room (36°C) overnight. After curing the PDMS, the pins were removed, and then the PDMS barrier layer was peeled off from the mold. An actual fabrication picture was shown in the middle of the schematic.

### Hydrostatic pressure in culture chamber

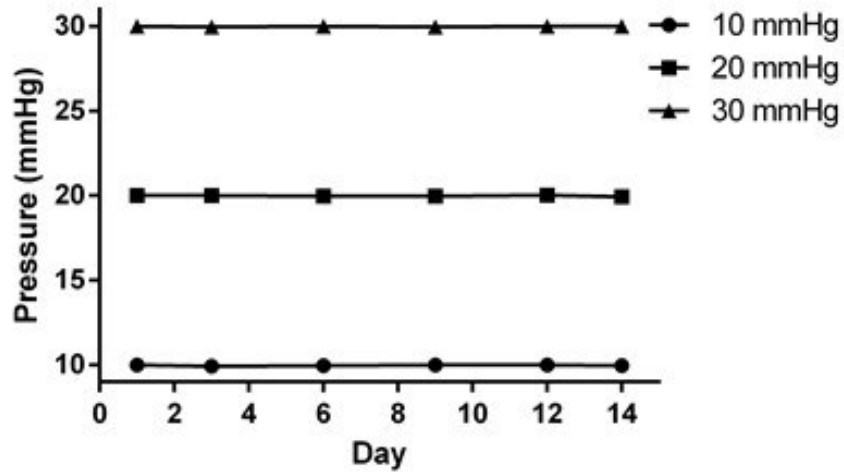

**Supplementary Figure 2. Two-week measurement of hydrostatic pressure in the microfluidic chip using VWR manometer. The hydrostatic pressure was very stable and accurate across the two-week measurement with standard deviations of smaller than 0.04. It was within expectation as the culture condition was totally static. The only factor that may affect the pressure was medium evaporation, which was significantly reduced in a humidified incubator. There was no observable change in medium volume within the 3-day refreshing duration. Technical repeats N=3. Mean  $\pm$  SD.**

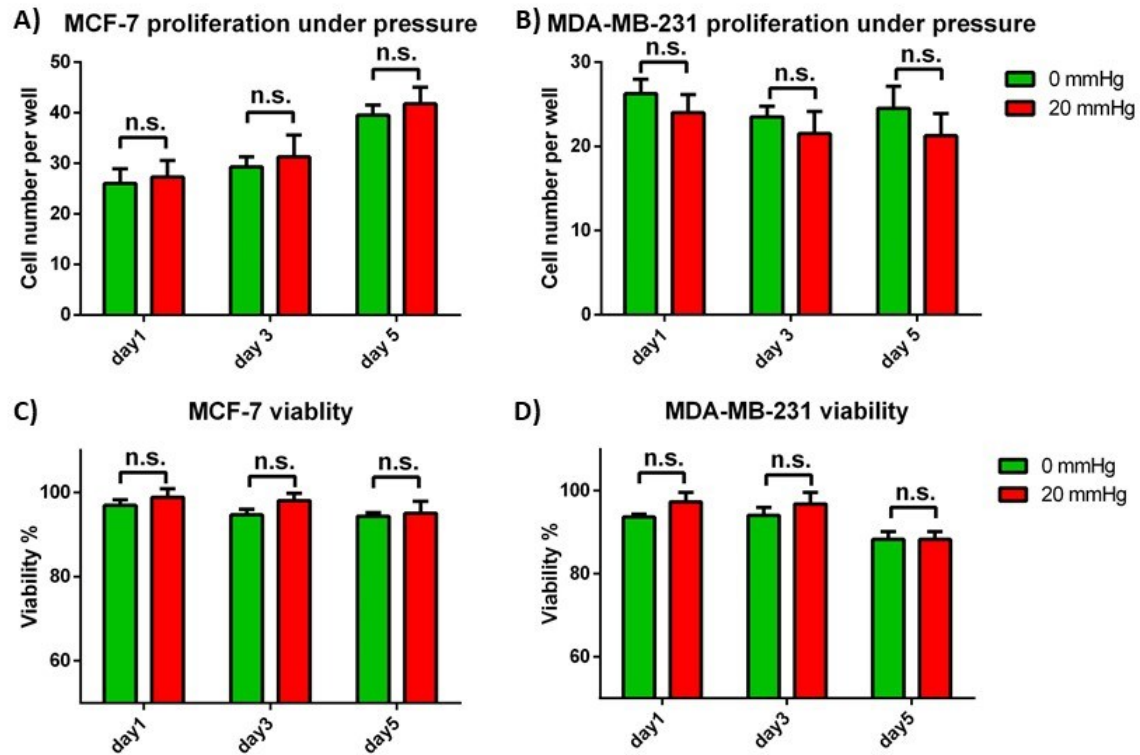

**Supplementary Figure 3. Phenotyping of spheroids under different pressures.** A) & B) Representative images of Hoechst, Calcein-AM, and PI staining of spheroids formed by MCF-7 and MDA-MB-231. C)&D) Proliferation of MCF-7 and MDA-MB-231 cells in microwells. Green bars represent 0 mmHg condition; Red bar represents 20 mmHg condition. n.s. is  $p > 0.05$ .

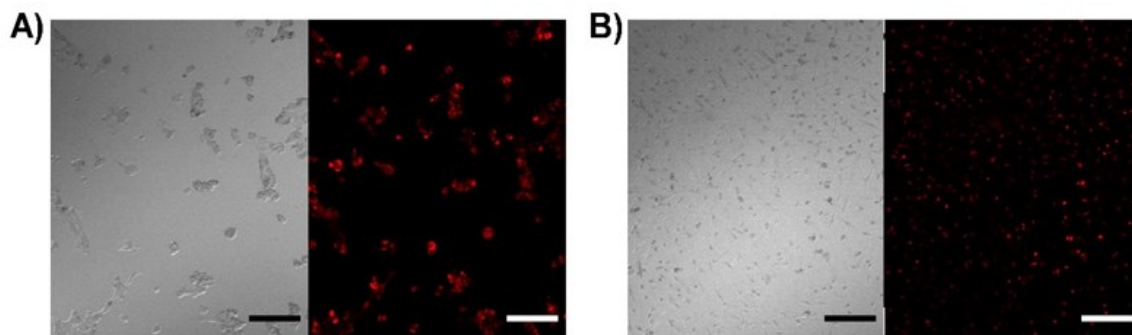

**Supplementary Figure 4. Transfection efficiency of siRNA.** A) & B) Representative bright field and fluorescent images of BLOCK-iT™ Alexa Fluor™ Red Fluorescent Control in MCF-7 and MDA-MB-231. Scale bar = 100  $\mu\text{m}$ .

**A) MCF-7 PTX IC50 plot**

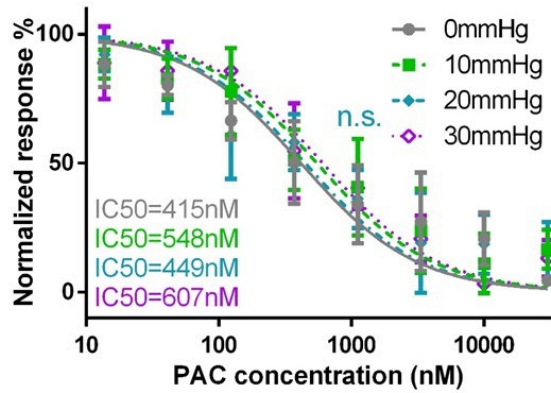

**B) MDA-MB-231 PTX IC50 plot**

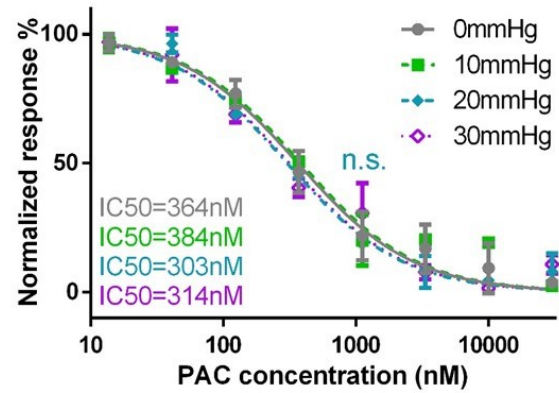

**Supplementary Figure 5. Paclitaxel (PTX) testing under different pressure conditions in MCF-7 and MDA-MB-231 cells.** A) & B) PTX IC50 curve of MCF-7 and MDA-MB-231 cells under 0, 10, 20, 30 mmHg conditions. The result of the two-way ANOVA test between 0 and 20 mmHg at 1  $\mu$ M PTX is indicated in the figures. No significant difference was observed between all pressure conditions in either cell type. n=3.

**Supplementary Table 1. Cluster formation in 39 liquid biopsy samples from breast cancer patients. In both metastatic status and presence of clusters, 'Y' stands for 'Yes' and 'N' stands for 'No.'**

| <b>ID</b> | <b>Hormone receptor status</b> | <b>Timepoint</b> | <b>Metastatic status</b> | <b>Remarks</b>             | <b>Presence of clusters</b> |
|-----------|--------------------------------|------------------|--------------------------|----------------------------|-----------------------------|
| BC277     | ER- PR- HER2+                  | Post-treatment   | N                        | 5-FU testing               | Y                           |
| BC255     | ER+PR+HER2-                    | Post-treatment   | Y                        | Dox testing                | Y                           |
| BC266     | ER+PR+HER2-                    | Post-treatment   | Y                        | Negative cluster formation | N                           |
| BC262     | ER+PR+HER2-                    | Pre-treatment    | N                        | Dox testing                | Y                           |
| BC286     | ER+PR+ HER2-                   | Post-treatment   | Y                        | Dox testing                | Y                           |
| BC271     | ER+PR+ HER2+                   | Pre-treatment    | N                        | Negative cluster formation | N                           |
| BC287     | ER+PR- HER2-                   | Post-treatment   | N                        | device characterization    | Y                           |
| BC280     | ER+PR+ HER2-                   | Post-treatment   | Y                        | Negative cluster formation | Y                           |
| BC283     | ER+ PR- HER2-                  | Post-treatment   | N                        | Dox testing                | Y                           |
| BC261     | ER+PR- HER2+                   | Post-treatment   | N                        | Negative cluster formation | N                           |
| BC277     | ER- PR- HER2+                  | Pre-treatment    | N                        | cell line development      | Y                           |
| BC287     | ER+PR- HER2-                   | Pre-treatment    | N                        | Negative cluster formation | N                           |
| BC247     | ER+PR+ HER2-                   | Post-treatment   | Y                        | 5-FU testing               | Y                           |
| BC130     | ER-PR- HER2+                   | Post-treatment   | Y                        | Contamination              | N                           |
| BC271     | ER+PR+ HER2+                   | Post-treatment   | N                        | Negative cluster formation | N                           |

|       |              |                |   |                                  |   |
|-------|--------------|----------------|---|----------------------------------|---|
| BC263 | ER+PR+ HER2- | Post-treatment | Y | Contamination                    | N |
| BC323 | ER+PR- HER2- | Pre-treatment  | N | Contamination                    | N |
| BC325 | ER+PR+ HER2- | Pre-treatment  | Y | Negative cluster formation       | N |
| BC345 | ER-PR+ HER2+ | Pre-treatment  | Y | Contamination                    | N |
| BC347 | ER+PR- HER2- | Pre-treatment  | Y | Negative cluster formation       | N |
| BC256 |              | Pre-treatment  | Y | PCR                              | Y |
| BC325 | ER+PR+ HER2- | Pre-treatment  | Y | Dox testing                      | Y |
| BC343 | ER+PR+ HER2+ | Post-treatment | Y | Negative cluster formation       | N |
| BC352 | ER+PR+ HER2+ | Pre-treatment  | Y | Dox testing                      | Y |
| BC347 | ER+PR+ HER2- | Post-treatment | Y | CTC subpopulation immunostaining | Y |
| BC359 | ER-PR- HER2+ | Pre-treatment  | N | Dox and 5FU testing              | Y |
| BC362 | ER+PR+ HER2- | Post-treatment | Y | Dox testing                      | Y |
| BC366 | ER+PR+ HER2- | Pre-treatment  | N | PTX testing                      | Y |
| BC367 | ER+PR+ HER2+ | Pre-treatment  | N | Dox testing                      | Y |
| BC359 | ER+PR- HER2+ | Pre-treatment  | N | Negative cluster formation       | N |
| BC373 | ER+PR+ HER2- | Pre-treatment  | Y | Dox testing                      | Y |
| BC374 | ER+PR- HER2- | Pre-treatment  | Y | Dox testing                      | Y |
| BC373 | ER+PR+ HER2- | Pre-treatment  | Y | Dox testing                      | Y |

|       |                 |                |   |                               |   |
|-------|-----------------|----------------|---|-------------------------------|---|
| BC376 | ER+PR+<br>HER2+ | Pre-treatment  | N | Negative cluster<br>formation | N |
| BC378 | ER+PR- HER2-    | Pre-treatment  | Y | DOX testing                   | Y |
| BC379 | ER-PR- HER2+    | Pre-treatment  | Y | PTX testing                   | Y |
| BC366 | ER+PR- HER2-    | Post-treatment | N | cell line<br>development      | Y |
| BC380 | ER+PR+ HER2-    | Pre-treatment  | Y | Negative cluster<br>formation | N |
| BC378 | ER+ PR- HER2-   | Post-treatment | Y | PTX testing                   | Y |
